# Supplementary figures and images for: DI-tector: defective interfering viral genomes’ detector for next-generation sequencing data
Source: PubMed Central journal article supplement — RNA. 2018 Oct;24(10):1285–96. doi: 10.1261/rna.066910.118 (PMC6140465; doi:10.1261/rna.066910.118), 2018-10

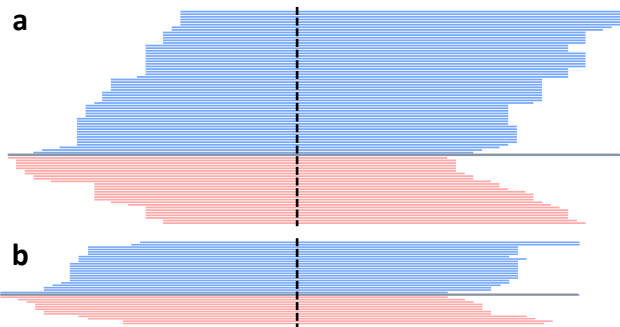

**Supplemental Figure 2.**

Supplement: supp_066910.118_Supplemental_Fig_S2.pdf [file supp_066910.118_Supplemental_Fig_S2.pdf]

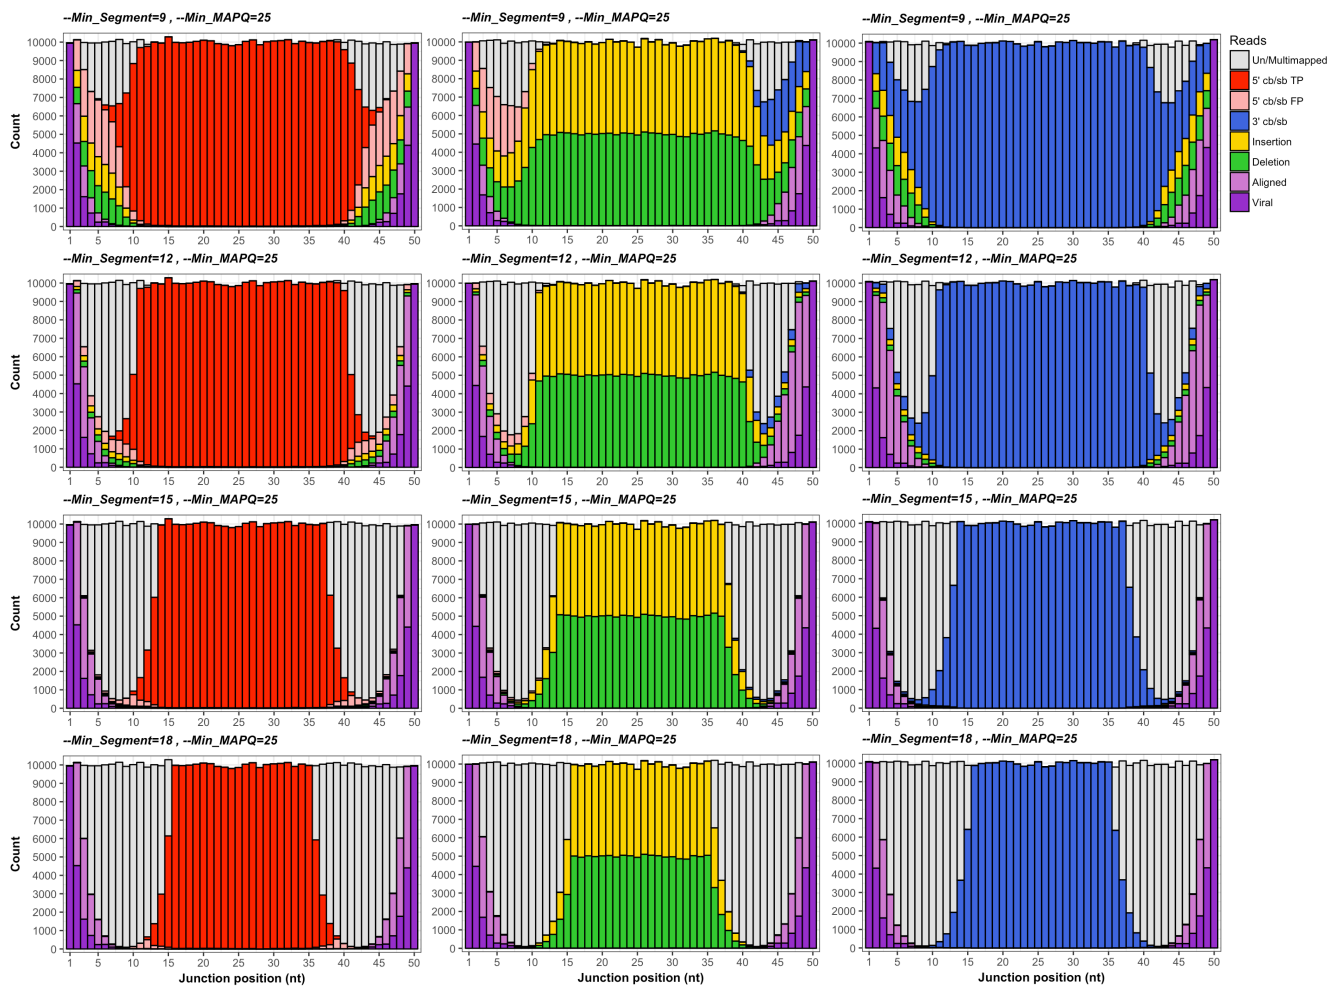

Supplemental Figure 3.

Supplement: supp_066910.118_Supplemental_Fig_S3.pdf [file supp_066910.118_Supplemental_Fig_S3.pdf]

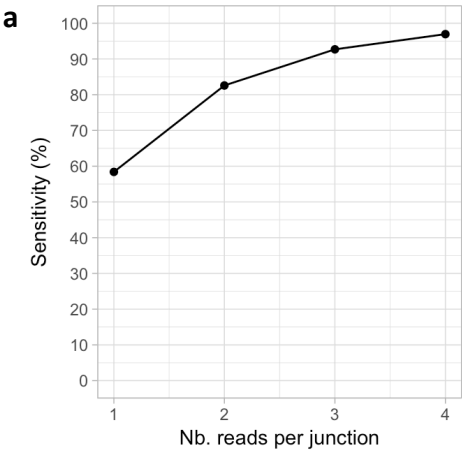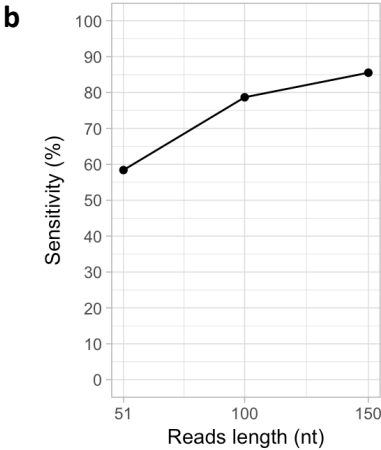

**Supplemental Figure 4.**

Supplement: supp_066910.118_Supplemental_Fig_S4.pdf [file supp_066910.118_Supplemental_Fig_S4.pdf]
